# Supplementary material for: Insights into the vacancy behaviour at the interface of As–Sb lateral heterostructures
Source: Royal Society of Chemistry journal article supplement (doi:10.1039/c9tc05395f), 2019-11-18
Supplement: c9tc05395f1.pdf [file c9tc05395f1.pdf]

***Insights into the vacancy behaviour at the interface of As-Sb lateral  
heterostructures***

*Lei Ao\* and Zhihua Xiong\**

*Key Laboratory for Optoelectronics and Communication of Jiangxi Province, Jiangxi Science & Technology*

*Normal University, Nanchang 330018, China*

*Email: [al20060608@126.com](mailto:al20060608@126.com)*

*Email: [xiong\\_zhihua@126.com](mailto:xiong_zhihua@126.com)*

**Table S1** Overview of the defect formation energy ( $E_f$ ) and the electronic/magnetic properties including the total magnetic moment (Mag.), bandgap ( $E_g$ ), orbital compositions of band edges of defective arsenene, antimonene, and As-Sb LHSs. The results for the pristine arsenene, antimonene, and As-Sb LHS are also given for comparison. The direct and indirect band gap are denoted as “d” and “i”, respectively. Both of  $E_f$  and  $E_g$  are in the unit of eV. Mag. is in the unit of  $\mu_B$ .  $E_f$  of the lowest-energy configuration in each group is italicized.

| Defect               | $E_f$ | Mag. | $E_g$                                        | VBM Orbital                                          | CBM Orbital                                                            | Defect                 | $E_f$ | Mag. | $E_g$                                        | VBM Orbital                              | CBM Orbital                                                            |
|----------------------|-------|------|----------------------------------------------|------------------------------------------------------|------------------------------------------------------------------------|------------------------|-------|------|----------------------------------------------|------------------------------------------|------------------------------------------------------------------------|
| <b>Arsenene (As)</b> |       |      |                                              |                                                      |                                                                        | <b>Antimonene (Sb)</b> |       |      |                                              |                                          |                                                                        |
| Pristine             | -     | -    | 1.61 (i)                                     | As ( $p_x + p_y$ )                                   | As ( $p_y + p_z$ )                                                     | Pristine               | -     | -    | 1.26 (i)                                     | Sb ( $p_x + p_y$ )                       | Sb ( $p_y + p_z$ )                                                     |
| SV-59                | 2.02  | 1.00 | 0.56 (i) $\uparrow$<br>0.91 (i) $\downarrow$ | As $p_x \uparrow$<br>As ( $p_y + p_z$ ) $\downarrow$ | As ( $p_x + p_y + p_z$ ) $\uparrow$<br>As ( $p_x + p_z$ ) $\downarrow$ | SV-59                  | 1.70  | 1.00 | 0.45 (i) $\uparrow$<br>0.71 (i) $\downarrow$ | Sb $p_x \uparrow$<br>Sb $p_y \downarrow$ | Sb ( $p_x + p_y + p_z$ ) $\uparrow$<br>Sb ( $p_x + p_z$ ) $\downarrow$ |
| DV-585               | 2.31  | -    | 1.06 (i)                                     | As $p_x$                                             | As ( $p_x + p_y + p_z$ )                                               | DV-585                 | 1.94  | -    | 0.88 (i)                                     | Sb $p_x$                                 | Sb ( $p_x + p_y + p_z$ )                                               |
| DV-555777            | 2.26  | -    | 1.43 (d)                                     | As ( $p_x + p_y + p_z$ )                             | As ( $p_x + p_y + p_z$ )                                               | DV-555777              | 1.89  | -    | 1.21 (d)                                     | Sb ( $p_x + p_y$ )                       | Sb ( $p_x + p_y + p_z$ )                                               |
| DV-55557777_1        | 2.66  | -    | 1.40 (d)                                     | As ( $p_x + p_y + p_z$ )                             | As ( $p_x + p_y + p_z$ )                                               | DV-55557777_1          | 2.24  | -    | 1.19 (d)                                     | Sb $p_y$                                 | Sb ( $p_x + p_y + p_z$ )                                               |
| DV-55557777_2        | 2.63  | -    | 1.39 (d)                                     | As ( $p_x + p_y + p_z$ )                             | As ( $p_x + p_y + p_z$ )                                               | DV-55557777_2          | 2.23  | -    | 1.16 (d)                                     | Sb $p_y$                                 | Sb ( $p_x + p_y + p_z$ )                                               |
| <b>As-Sb LHS</b>     |       |      |                                              |                                                      |                                                                        |                        |       |      |                                              |                                          |                                                                        |
| Pristine             | -     | -    | 0.46                                         | Sb $p_y$                                             | As $p_z$                                                               | DV-3-585-o             | 1.78  | 1.76 | 0.55 (d) $\uparrow$                          | Sb $p_y \uparrow$                        | As $p_z \uparrow$                                                      |
| SV-As-1              | 1.30  | 0.33 | Metal                                        | -                                                    | -                                                                      |                        |       |      | Half-metal                                   | -                                        | -                                                                      |
| SV-As-2              | 1.70  | 1.00 | 0.37 (i) $\uparrow$<br>0.14 (i) $\downarrow$ | Sb $p_y \uparrow$<br>Sb $p_y \downarrow$             | As $p_z \uparrow$<br>(As $p_y + Sb p_y$ ) $\downarrow$                 | DV-3-555777_1          | 1.65  | -    | 0.46 (i)                                     | Sb $p_y$                                 | As $p_z$                                                               |
| SV-Sb-1              | 1.04  | 1.00 | 0.51 (d) $\uparrow$<br>0.07 (d) $\downarrow$ | Sb $p_y \uparrow$<br>Sb $p_y \downarrow$             | As $p_z \uparrow$<br>As ( $p_x + p_z$ ) $\downarrow$                   | DV-3-55557777_1        | 1.67  | -    | 0.53 (d)                                     | Sb $p_y$                                 | As $p_z$                                                               |
| SV-Sb-2              | 0.98  | 1.00 | 0.51 (d) $\uparrow$<br>0.07 (d) $\downarrow$ | Sb $p_y \uparrow$<br>Sb $p_y \downarrow$             | As $p_z \uparrow$<br>Sb ( $p_x + p_z$ ) $\downarrow$                   | DV-3-55557777_3        | 1.51  | -    | 0.56 (d)                                     | Sb $p_y$                                 | As $p_z$                                                               |
| DV-1-585             | 1.67  | -    | 0.43 (d)                                     | Sb $p_y$                                             | As $p_z$                                                               |                        |       |      |                                              |                                          |                                                                        |
| DV-1-555777_1        | 2.41  | -    | 0.36 (d)                                     | Sb $p_y$                                             | As $p_z$                                                               | DV-4-585-o             | 2.68  | 1.61 | 0.21 (i) $\uparrow$                          | Sb $p_y \uparrow$                        | (As + Sb) ( $p_y + p_z$ ) $\uparrow$                                   |
| DV-1-555777_2        | 1.39  | -    | 0.50 (d)                                     | Sb $p_y$                                             | As $p_z$                                                               |                        |       |      | Half-metal                                   | -                                        | -                                                                      |
| DV-1-555777_3        | 2.38  | -    | 0.20 (d)                                     | Sb $p_y$                                             | As ( $p_y + p_z$ )                                                     | DV-4-555777_1          | 2.46  | -    | 0.37 (d)                                     | Sb $p_y$                                 | As $p_z$                                                               |
| DV-1-555777_4        | 1.46  | -    | 0.50 (d)                                     | Sb $p_y$                                             | As ( $p_x + p_z$ )                                                     | DV-4-555777_2          | 2.45  | -    | 0.32 (d)                                     | Sb $p_y$                                 | As $p_z$                                                               |
| DV-1-55557777_1      | 2.20  | -    | 0.40 (d)                                     | Sb $p_y$                                             | As $p_z$                                                               | DV-4-55557777_1        | 1.78  | -    | 0.50 (d)                                     | Sb $p_y$                                 | As ( $p_x + p_z$ )                                                     |

|                 |      |   |          |                   |                                          |                 |      |   |          |                   |                                          |
|-----------------|------|---|----------|-------------------|------------------------------------------|-----------------|------|---|----------|-------------------|------------------------------------------|
| DV-1-55557777_2 | 2.36 | - | 0.40 (d) | Sb p <sub>y</sub> | As p <sub>z</sub>                        | DV-4-55557777_2 | 1.79 | - | 0.50 (d) | Sb p <sub>y</sub> | As p <sub>z</sub>                        |
| DV-1-55557777_3 | 2.27 | - | 0.28 (d) | Sb p <sub>y</sub> | As p <sub>z</sub>                        | DV-4-55557777_3 | 1.75 | - | 0.51 (d) | Sb p <sub>y</sub> | As p <sub>z</sub>                        |
| DV-1-55557777_4 | 2.36 | - | 0.30 (d) | Sb p <sub>y</sub> | As p <sub>z</sub>                        |                 |      |   |          |                   |                                          |
| DV-2-585        | 1.66 | - | 0.41 (d) | Sb p <sub>y</sub> | (Sb p <sub>z</sub> + As p <sub>z</sub> ) |                 |      |   |          |                   |                                          |
| DV-2-555777_1   | 1.89 | - | 0.46 (d) | Sb p <sub>y</sub> | As p <sub>z</sub>                        | DV-5-585        | 0.39 | - | 0.55 (d) | Sb p <sub>y</sub> | As p <sub>z</sub>                        |
| DV-2-555777_2   | 0.98 | - | 0.57 (d) | Sb p <sub>y</sub> | As p <sub>z</sub>                        | DV-5-555777_1   | 1.01 | - | 0.55 (d) | Sb p <sub>y</sub> | As p <sub>z</sub>                        |
| DV-2-555777_3   | 1.97 | - | 0.38 (d) | Sb p <sub>y</sub> | As p <sub>z</sub>                        | DV-5-555777_2   | 0.97 | - | 0.55 (d) | Sb p <sub>y</sub> | (Sb p <sub>z</sub> + As p <sub>z</sub> ) |
| DV-2-555777_4   | 1.10 | - | 0.55 (d) | Sb p <sub>y</sub> | As p <sub>z</sub>                        | DV-5-55557777_1 | 1.76 | - | 0.52 (d) | Sb p <sub>y</sub> | As p <sub>z</sub>                        |
| DV-2-55557777_1 | 1.32 | - | 0.51 (d) | Sb p <sub>y</sub> | As p <sub>z</sub>                        | DV-5-55557777_2 | 1.75 | - | 0.56 (d) | Sb p <sub>y</sub> | As p <sub>z</sub>                        |
| DV-2-55557777_2 | 1.54 | - | 0.49 (d) | Sb p <sub>y</sub> | As p <sub>z</sub>                        | DV-5-55557777_3 | 1.74 | - | 0.58 (d) | Sb p <sub>y</sub> | As p <sub>z</sub>                        |
| DV-2-55557777_3 | 1.45 | - | 0.44 (d) | Sb p <sub>y</sub> | As p <sub>z</sub>                        |                 |      |   |          |                   |                                          |
| DV-2-55557777_4 | 1.61 | - | 0.43 (d) | Sb p <sub>y</sub> | As p <sub>z</sub>                        |                 |      |   |          |                   |                                          |

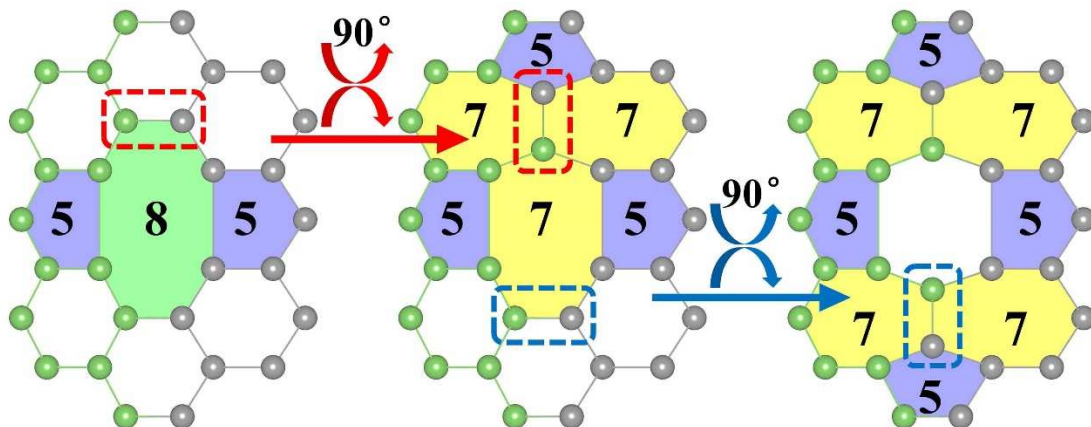

**Fig. S1** Schematic view of the formation mechanisms of interface DV-555777s and DV-555777s reconstructed from DV-585s. The pentagon, heptagon, and octagon are colored in blue, yellow, and green, respectively. The As and Sb atoms are represented by the green and gray balls, respectively.

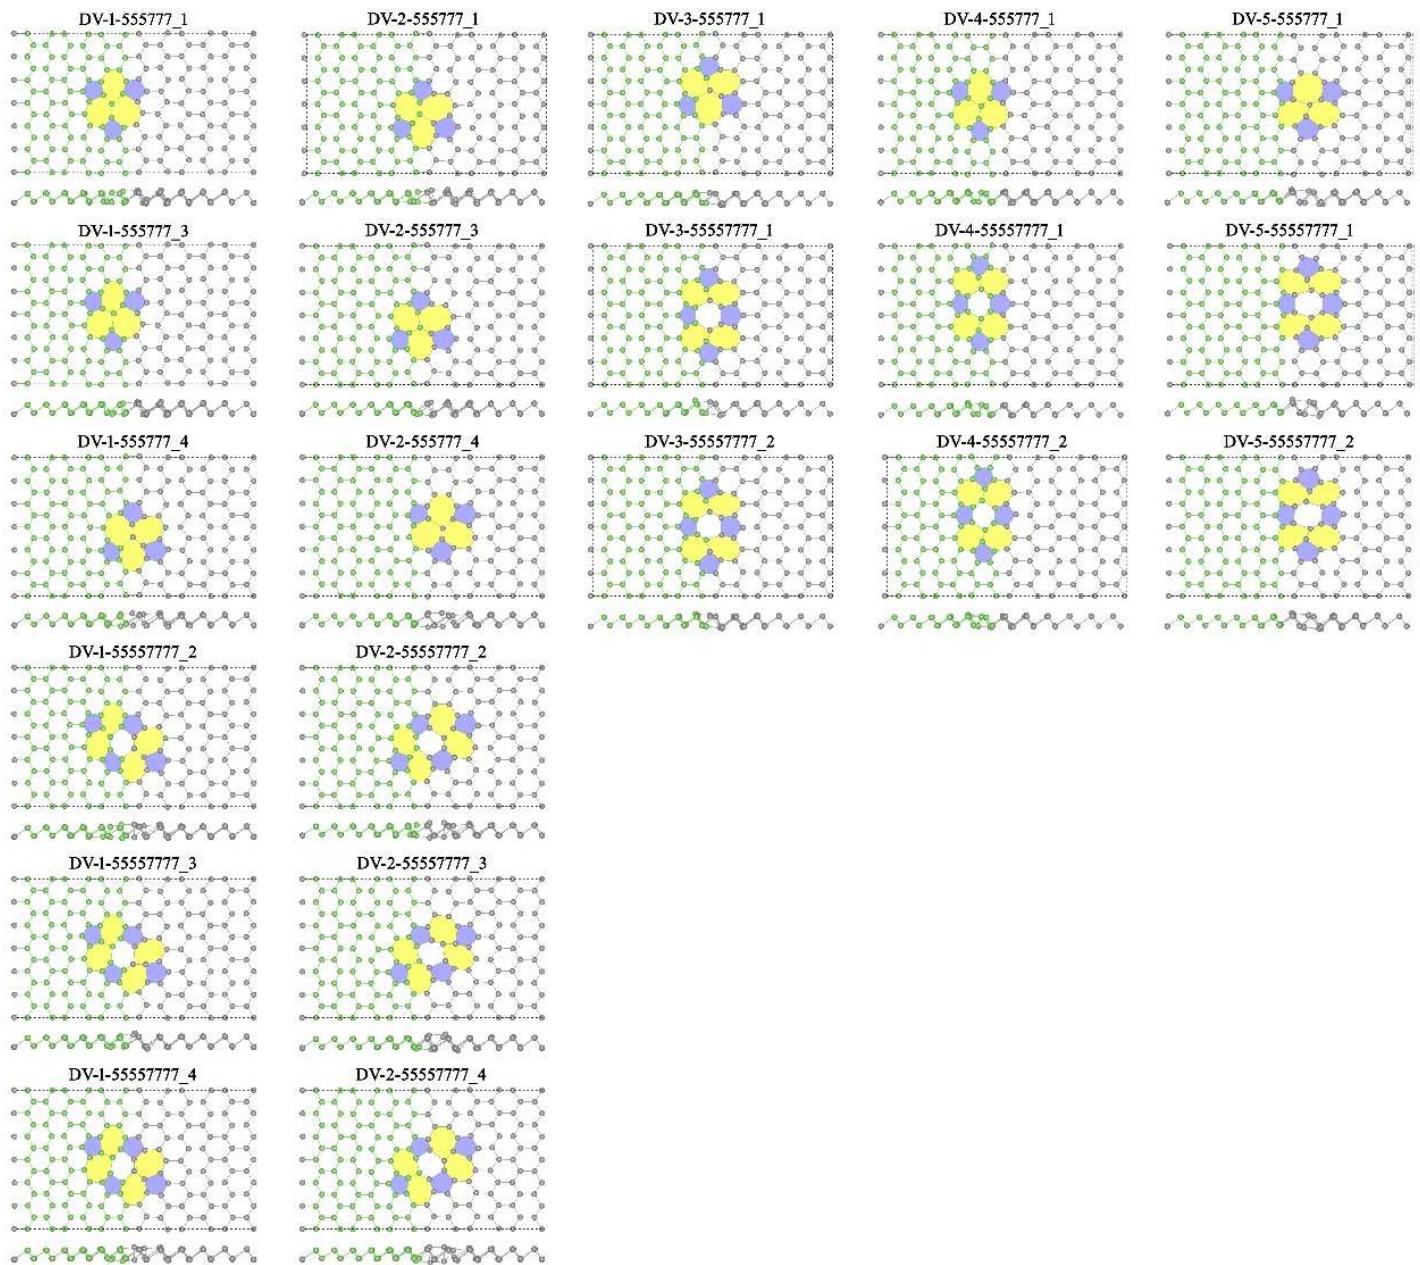

**Fig. S2** Top (up) and side (down) views of the optimized structures of interface DVs in each group. The pentagon, heptagon, and octagon are colored in blue, yellow, and green, respectively. The As and Sb atoms are represented by the green and gray balls, respectively.

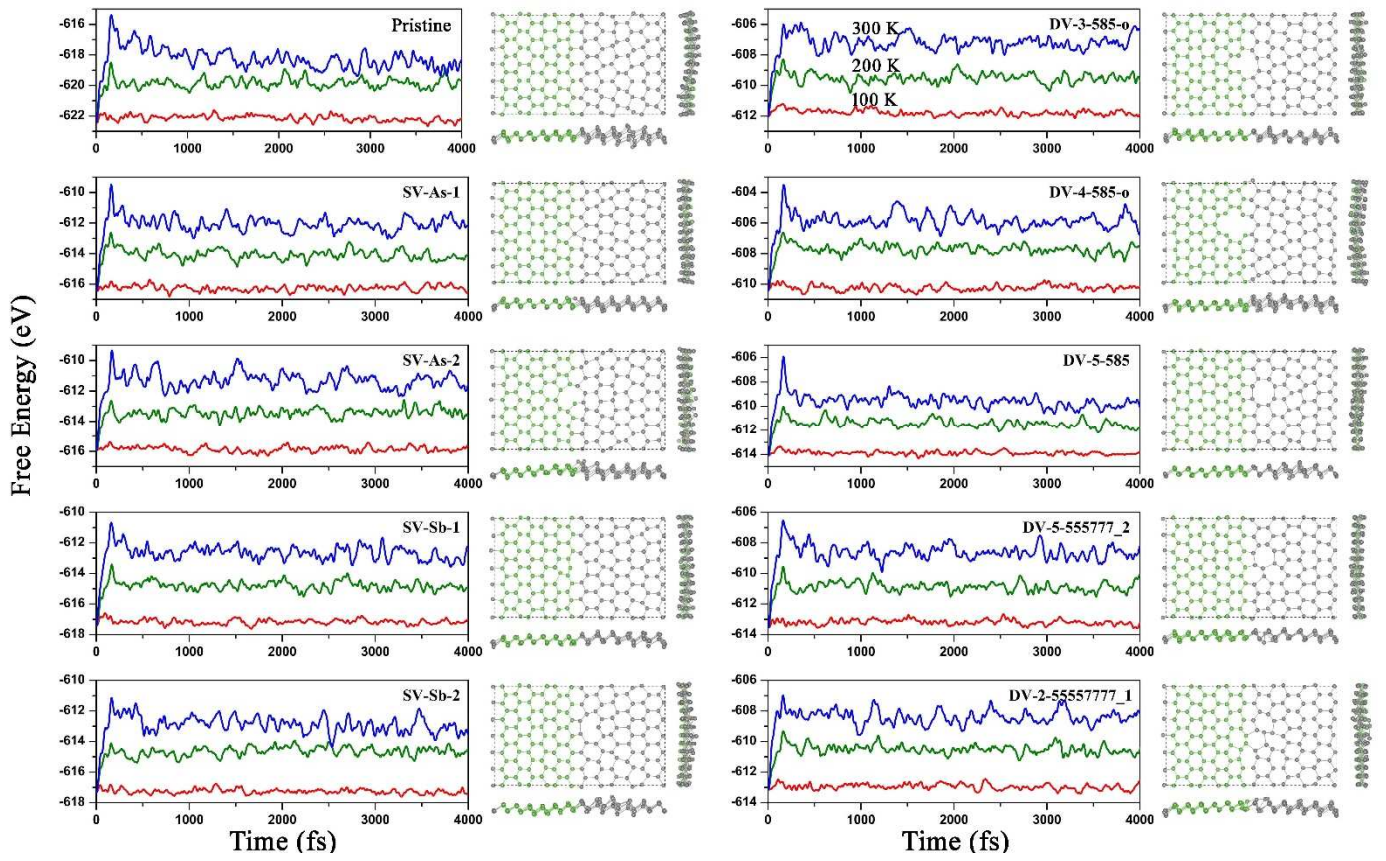

**Fig. S3** The variation of the free energy (left) and the top/side views of the snapshot (right) for the pristine and defective As-Sb LHSs in the *ab initio* molecular dynamics simulation at 300 K during 4 ps.

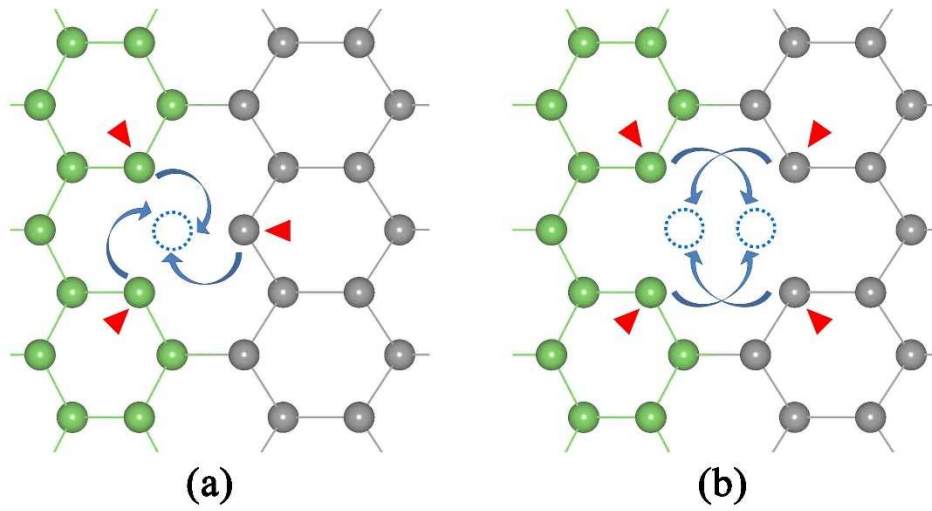

**Fig. S4** The schematic view of the possible diffusion paths for the migration of interface (a) SVs and (b) DV-585s based on the atom-exchange mechanism. The atoms first-neighbouring to the vacant sites (denoted by dashed circles) are marked by red solid triangles. The As and Sb atoms are represented by the green and gray balls, respectively.

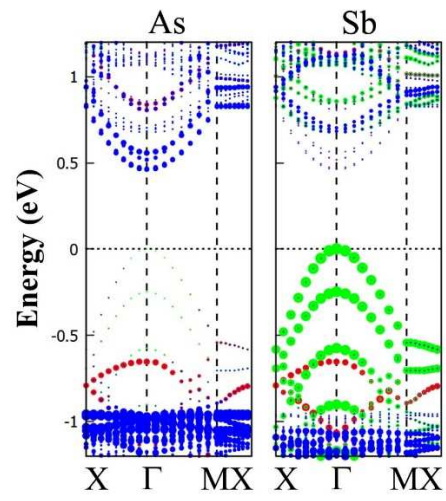

**Fig. S5** The orbital-resolved band structure of pristine As-Sb LHS. The  $p_x$ ,  $p_y$ , and  $p_z$  orbitals are shown by the red, green, and blue circles, respectively, where the size of the circle is proportional to the weight of the partial p orbital. The Fermi level is set at zero.



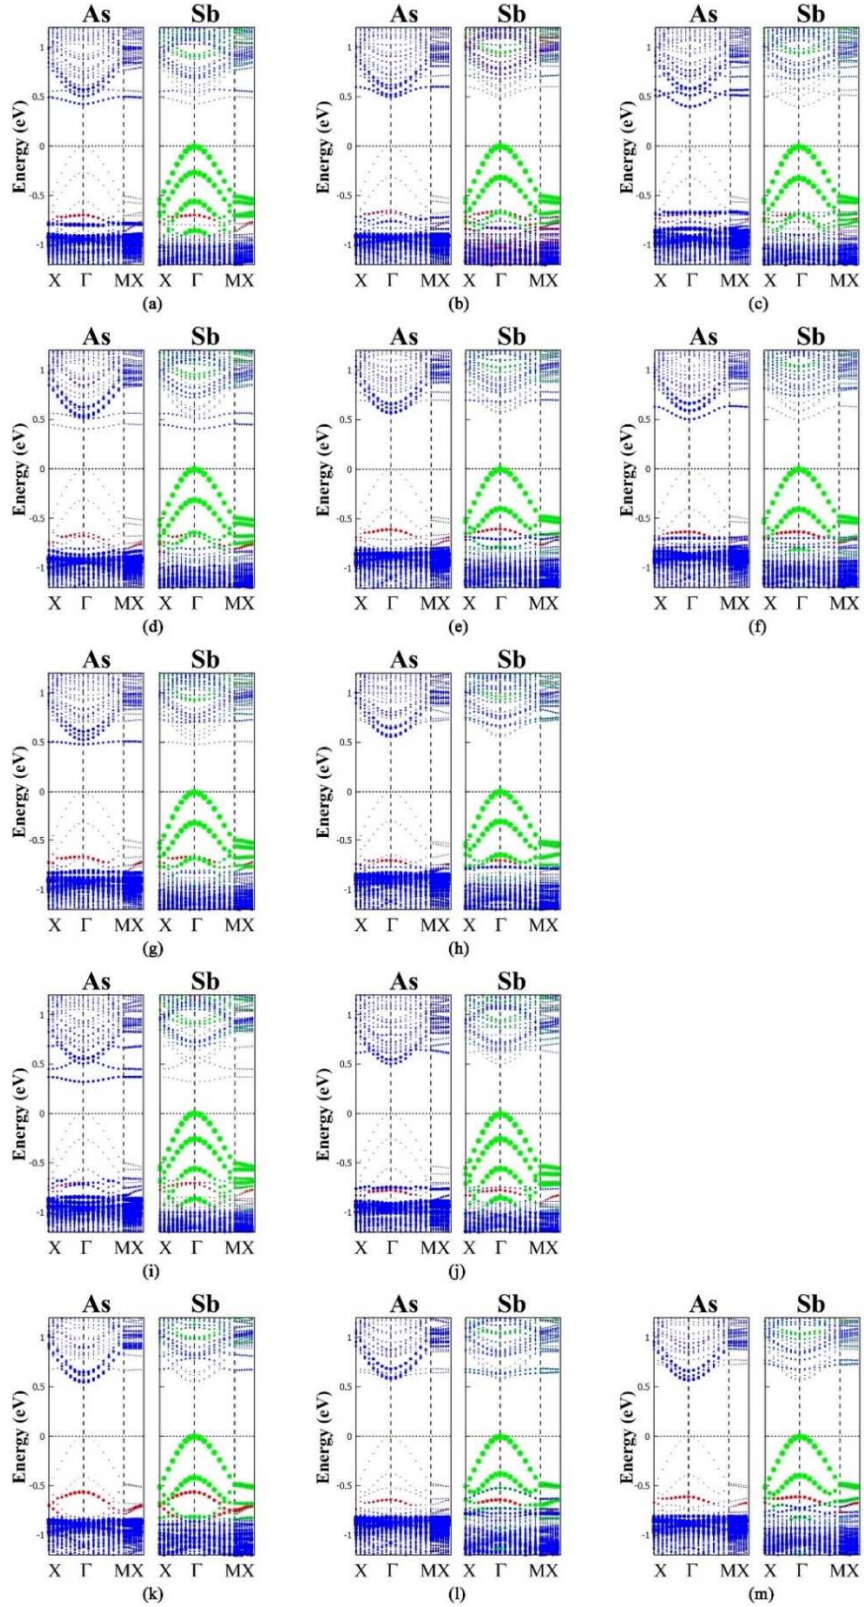

**Fig. S6** The orbital-resolved band structures of As-Sb LHSs with nonmagnetic defects of (a) DV-1-585, (b) DV-1-555777\_2, (c) DV-1-55557777\_1, (d) DV-2-585, (e) DV-2-555777\_2, (f) DV-2-55557777\_1, (g) DV-3-555777\_2, (h) DV-3-55557777\_3, (i) DV-4-555777\_2, (j) DV-4-55557777\_3, (k) DV-5-585, (l) DV-5-555777\_2 and (m) DV-5-55557777\_3. The  $p_x$ ,  $p_y$ , and  $p_z$  orbitals are shown by the red, green, and blue circles, respectively, where the size of the circle is proportional to the weight of the partial p orbital. The Fermi level is set at zero.

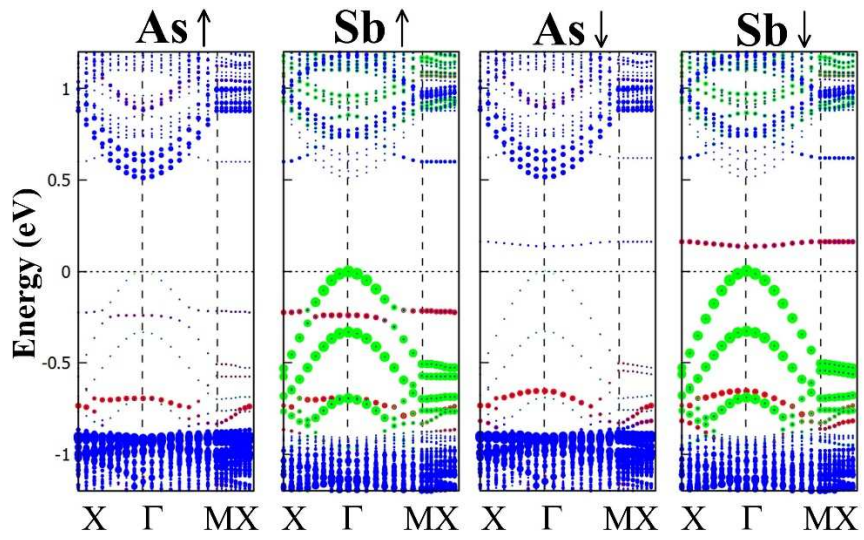

**Fig. S7** The orbital-resolved band structure of defective As-Sb LHS with SV-1. Note that SV-1 is the final states in the migration process of SV-As-1 perpendicular to the interface as illustrated in Fig. 4(a). The  $p_x$ ,  $p_y$ , and  $p_z$  orbitals are shown by the red, green, and blue circles, respectively, where the size of the circle is proportional to the weight of the partial p orbital. The Fermi level is set at zero.

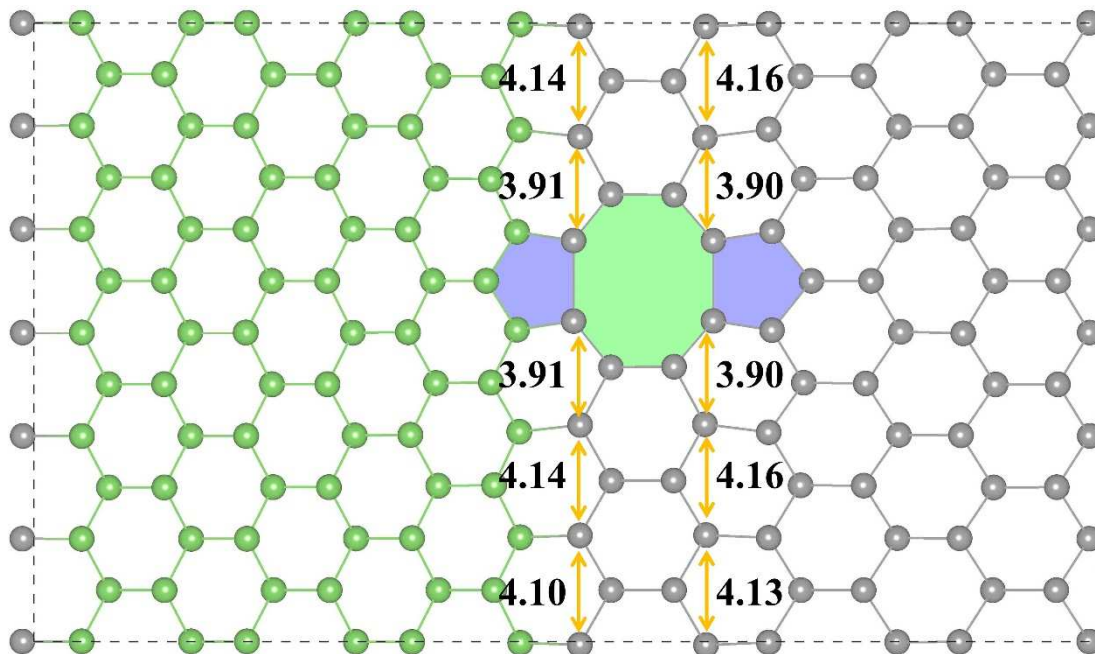

**Fig. S8** Optimized Sb-Sb distances (in the unit of Å) parallel to the interface of DV-5-585 decorated As-Sb LHSs. The pentagon and octagon are colored in blue and green, respectively. The As and Sb atoms are represented by the green and gray balls, respectively.
